# Supplementary material for: Reconstructing Surface Eruptive Sequence of 2018 Small Phreatic Eruption of Iwo-Yama Volcano, Kirishima Volcanic Complex, Japan by Infrasound Cross-correlation Analysis
Source: Research Square preprint supplement (doi:10.21203/rs.3.rs-102486/v1), 2020-11-06
Supplement: Supplementary file 1 [file 4363ea6752501b89395ddcf3.pdf]

Additional File 1

**Expected lag times for each crater and vent**

We estimated the lag times for the infrasound arrivals at KREB station to those at EBQ7 station from South Crater vents (Y1, Y2a, Y2b, and Y3) and West Crater vents (W1–W7). We assumed the atmospheric temperature to be in the range of 272–296 K (see the main text for details). They are summarized in Table A1.

|                      |      | <i>Iwo-yama South Craters</i> |      |      |      | <i>Iwo-yama West Crater</i> |      |      |      |      |      |      |
|----------------------|------|-------------------------------|------|------|------|-----------------------------|------|------|------|------|------|------|
|                      |      | Y1                            | Y2a  | Y2b  | Y3   | W1                          | W2   | W3   | W4   | W5   | W6   | W7   |
| Sound velocity [m/s] | 330  | 1.62                          | 1.58 | 1.55 | 1.53 | 0.59                        | 0.66 | 0.75 | 0.73 | 0.79 | 0.85 | 0.73 |
|                      | 331  | 1.62                          | 1.57 | 1.55 | 1.53 | 0.59                        | 0.66 | 0.74 | 0.73 | 0.79 | 0.85 | 0.73 |
|                      | 332  | 1.61                          | 1.57 | 1.54 | 1.52 | 0.59                        | 0.65 | 0.74 | 0.73 | 0.78 | 0.85 | 0.72 |
|                      | 333  | 1.61                          | 1.56 | 1.54 | 1.52 | 0.59                        | 0.65 | 0.74 | 0.73 | 0.78 | 0.84 | 0.72 |
|                      | 334  | 1.60                          | 1.56 | 1.53 | 1.51 | 0.59                        | 0.65 | 0.74 | 0.73 | 0.78 | 0.84 | 0.72 |
|                      | 335  | 1.60                          | 1.55 | 1.53 | 1.51 | 0.58                        | 0.65 | 0.73 | 0.72 | 0.78 | 0.84 | 0.72 |
|                      | 336  | 1.59                          | 1.55 | 1.52 | 1.50 | 0.58                        | 0.65 | 0.73 | 0.72 | 0.77 | 0.84 | 0.71 |
|                      | 337  | 1.59                          | 1.55 | 1.52 | 1.50 | 0.58                        | 0.64 | 0.73 | 0.72 | 0.77 | 0.83 | 0.71 |
|                      | 338  | 1.58                          | 1.54 | 1.51 | 1.49 | 0.58                        | 0.64 | 0.73 | 0.72 | 0.77 | 0.83 | 0.71 |
|                      | 339  | 1.58                          | 1.54 | 1.51 | 1.49 | 0.58                        | 0.64 | 0.73 | 0.72 | 0.77 | 0.83 | 0.71 |
|                      | 340  | 1.57                          | 1.53 | 1.50 | 1.48 | 0.58                        | 0.64 | 0.72 | 0.71 | 0.77 | 0.83 | 0.71 |
|                      | 341  | 1.57                          | 1.53 | 1.50 | 1.48 | 0.57                        | 0.64 | 0.72 | 0.71 | 0.76 | 0.82 | 0.70 |
|                      | 342  | 1.56                          | 1.52 | 1.50 | 1.48 | 0.57                        | 0.64 | 0.72 | 0.71 | 0.76 | 0.82 | 0.70 |
|                      | 343  | 1.56                          | 1.52 | 1.49 | 1.47 | 0.57                        | 0.63 | 0.72 | 0.71 | 0.76 | 0.82 | 0.70 |
|                      | 344  | 1.56                          | 1.51 | 1.49 | 1.47 | 0.57                        | 0.63 | 0.71 | 0.70 | 0.76 | 0.82 | 0.70 |
| 345                  | 1.55 | 1.51                          | 1.48 | 1.46 | 0.57 | 0.63                        | 0.71 | 0.70 | 0.75 | 0.81 | 0.70 |      |

**Table A1.** Table of the expected lag times in seconds.
